# Supplementary material for: pTC Plasmids from Sulfolobus Species in the Geothermal Area of Tengchong, China: Genomic Conservation and Naturally-Occurring Variations as a Result of Transposition by Mobile Genetic Elements
Source: MDPI journal article supplement (doi:10.3390/life5010506), 2015-02-12
Supplement: s1 [file s1]

## Supplementary Materials

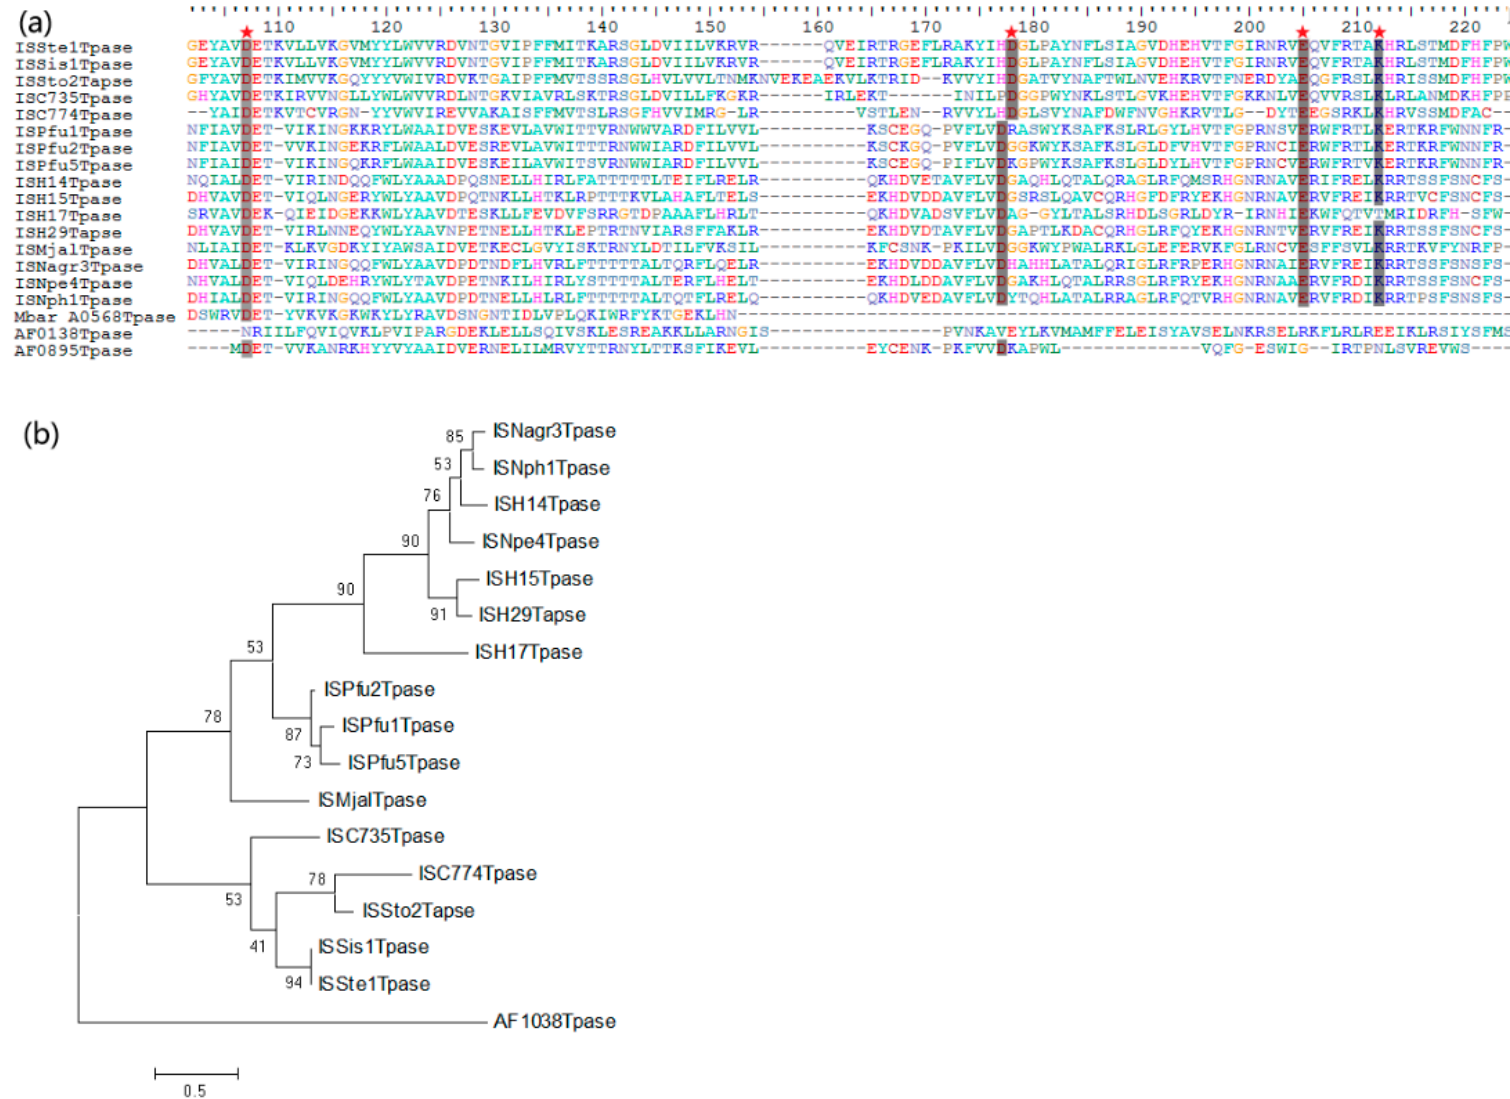

**Figure S1.** (a) Sequence alignment of the conserved DDE domains of transposases of the *IS6* family. Amino acid residues D...D...E...K are shown in grey background (b) Phylogenetic tree of transposases of the *IS6* family.

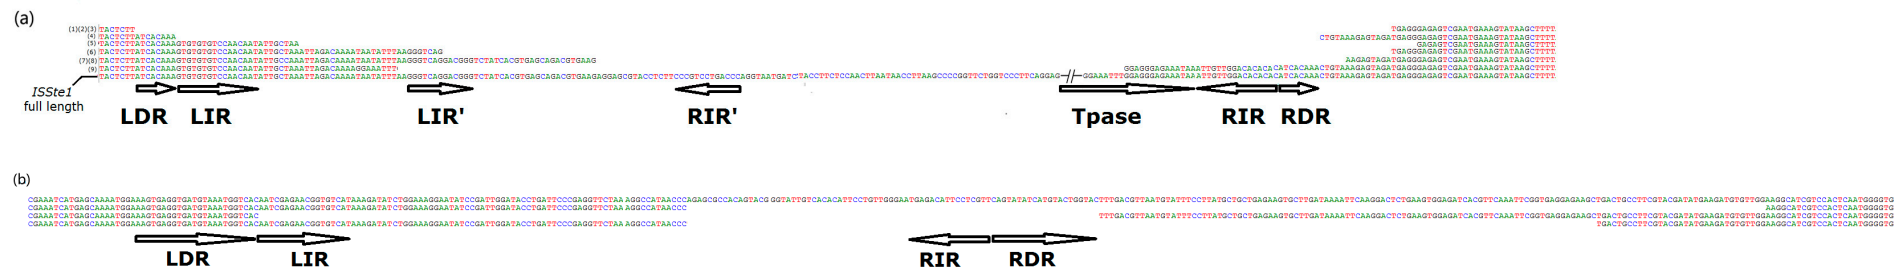

**Figure S2.** Sequences of deletions at the sites of transposition by *ISSte1* (a) and MITE (b). See Figure 5 for deletion categories.
